# Supplementary material for: Could perturbed fetal development of the ovary contribute to the development of polycystic ovary syndrome in later life?
Source: PubMed Central journal article supplement (PMC7032716; doi:10.1371/journal.pone.0229351), 2020-02-20

**Fig S8. Differential mRNA expression levels of PCOS candidate genes which are steadily expressed throughout gestation in the cortex and medulla of bovine fetal ovaries.** Samples were grouped into early (n = 5, 10 – 17 weeks of gestation) and late (n= 5, 36 – 39 weeks of gestation) stages of gestation. Data are presented as mean  $\pm$  s.e.m. (normalised to *PPIA* and *RPL32*). Black and grey bars represent cortex and medulla, respectively. Unpaired t-test were applied to analyse the data. \* $P < 0.05$ .

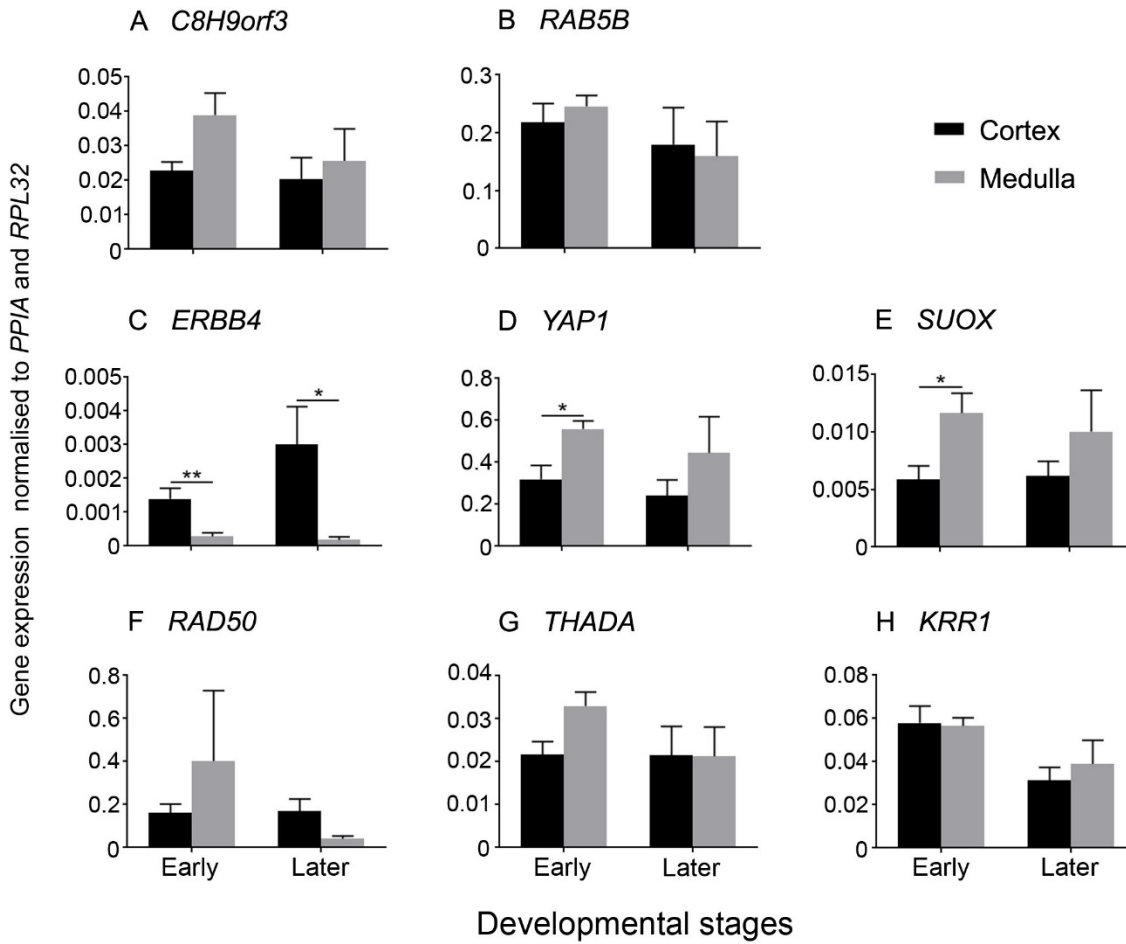

Supplement: pone.0229351.s008.pdf [file pone.0229351.s008.pdf]
