# Supplementary material for: Could perturbed fetal development of the ovary contribute to the development of polycystic ovary syndrome in later life?
Source: PubMed Central journal article supplement (PMC7032716; doi:10.1371/journal.pone.0229351), 2020-02-20

**Fig S9. Differential mRNA expression of control genes in the cortex and medulla of bovine fetal ovaries.** Samples were grouped into early (n = 5, 10 – 17 weeks of gestation) and late (n= 5, 36 – 39 weeks of gestation) stages of gestation. Data are presented as mean  $\pm$  s.e.m. (normalised to *PPIA* and *RPL32*). Black and grey bars represent cortex and medulla, respectively. Unpaired t-test were applied to analyse the data. \* $P < 0.05$ .

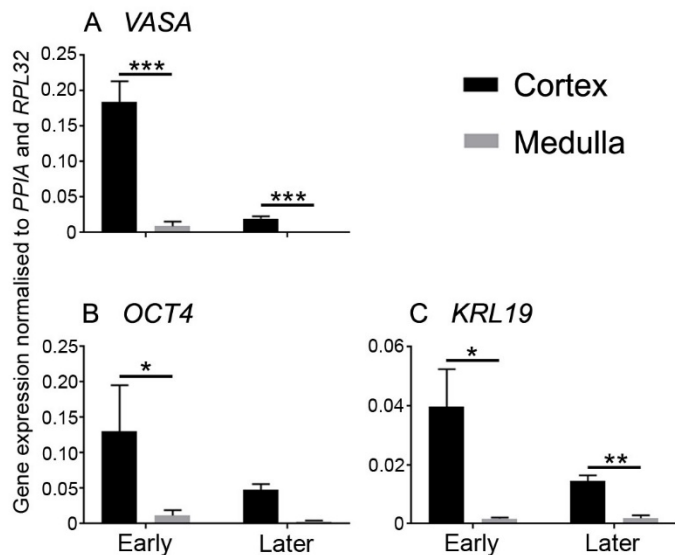

Supplement: pone.0229351.s009.pdf [file pone.0229351.s009.pdf]
