# Supplementary material for: Could perturbed fetal development of the ovary contribute to the development of polycystic ovary syndrome in later life?
Source: PubMed Central journal article supplement (PMC7032716; doi:10.1371/journal.pone.0229351), 2020-02-20

**Fig S11. Expression of PCOS candidate genes which are highly expressed during late gestation in bovine fetal fibroblasts from less than 150 days of gestation cultured in the presence of treatments grouped as indicated (A to F) for 18 h.** Data are represented as mean  $\pm$  s.e.m. of fold change in expression relative to the untreated control (n = 4 ovaries, each from 13, 14, 17 and 19 weeks of gestation). One-way ANOVA with Dunnet's *post hoc* test were used to analyse the data.

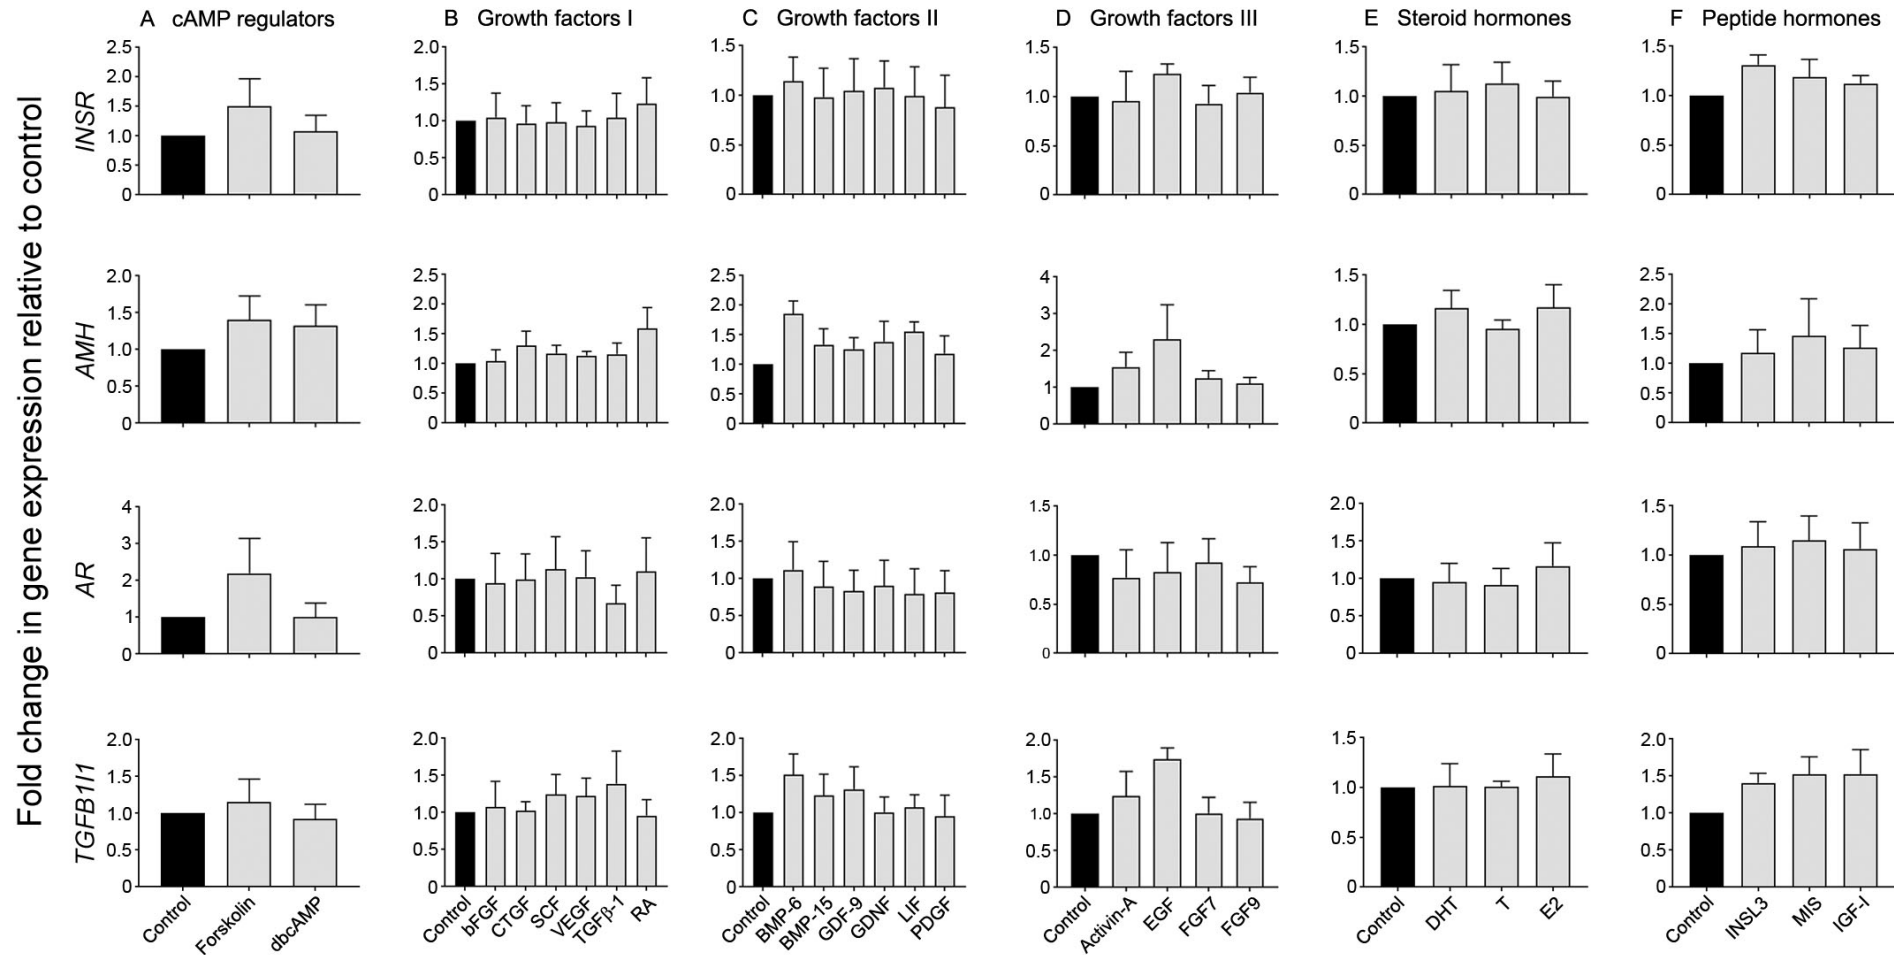

Supplement: pone.0229351.s011.pdf [file pone.0229351.s011.pdf]
