# Supplementary material for: Could perturbed fetal development of the ovary contribute to the development of polycystic ovary syndrome in later life?
Source: PubMed Central journal article supplement (PMC7032716; doi:10.1371/journal.pone.0229351), 2020-02-20
Supplement: pone.0229351.s014.pdf [file pone.0229351.s014.pdf]

**Table S2. Treatments used for bovine fetal fibroblasts.**

| <b>Category</b> | <b>Treatments</b>                       | <b>Concentration</b> | <b>Distribution</b>                                        |
|-----------------|-----------------------------------------|----------------------|------------------------------------------------------------|
| Stimulators     | Forskolin                               | 4.1 µg/mL            | Sigma-Aldrich                                              |
|                 | Dibutyryladenosine cyclic monophosphate | 1mM                  | Sigma-Aldrich                                              |
| Growth factors  | Basic fibroblast growth factor          | 100 ng/mL            | Roche Australia Pty Ltd, Thebarton, SA, Australia          |
|                 | Connective tissue growth factor         | 25 ng/mL             | Invitrogen/Life Technologies                               |
|                 | Stem cell factor                        | 100 ng/mL            | R&D Systems                                                |
|                 | Vascular endothelial growth factor      | 10 ng/mL             | R&D Systems                                                |
|                 | Transforming growth factor β1           | 10 ng/mL             | R&D Systems                                                |
|                 | Bone morphogenetic protein 6            | 100 ng/mL            | R&D Systems                                                |
|                 | Bone morphogenetic protein 15           | 100 ng/mL            | R&D Systems                                                |
|                 | Glial-derived factor 9                  | 100 ng/mL            | R&D Systems                                                |
|                 | Glial-cell derived neurotrophic factor  | 100 ng/mL            | R&D Systems                                                |
|                 | Leukemia inhibitory factor              | 10 <sup>3</sup> U/mL | Sigma-Aldrich                                              |
|                 | Platelet-derived growth factor          | 10 ng/mL             | R&D Systems                                                |
|                 | Activin A                               | 100 ng/mL            | R&D Systems                                                |
|                 | Epidermal growth factor                 | 10 ng/mL             | Boehringer Ingelheim Pty Ltd, North Ryde, NSW, Australia   |
|                 | Fibroblast growth factor 7              | 10 ng/mL             | R&D Systems                                                |
|                 | Fibroblast growth factor 9              | 30 ng/mL             | R&D Systems                                                |
|                 | Retinoic acid                           | 3 µg/mL              | Sigma-Aldrich                                              |
| Hormones        | Dihydroxytestosterone                   | 100 ng/mL            | Sigma-Aldrich                                              |
|                 | Testosterone                            | 100 ng/mL            | Sigma-Aldrich                                              |
|                 | Estradiol                               | 100 ng/mL            | Sigma-Aldrich                                              |
|                 | Insulin-like protein 3                  | 100 ng/mL            | From Dr Ross Bathgate – University of Melbourne, Australia |
|                 | Mullerian-inhibiting substance          | 10 ng/mL             | Biogen Idec Australia Pty Ltd, North Ryde, NSW, Australia  |
|                 | Insulin-like growth factor 1            | 30 ng/mL             | GroPep Bioreagents Pty Ltd, Thebarton, SA, Australia       |
